# Supplementary material for: Phytochemical Composition and Health Benefits of Figs (Fresh and Dried): A Review of Literature from 2000 to 2022
Source: MDPI journal article supplement (doi:10.3390/nu15112623), 2023-06-03
Supplement: s1 [file s1]

# **Phytochemical Composition and Health Benefits of Figs (Fresh and Dried): A Review of Literature from 2000 to 2022**

**Amandeep K. Sandhu, Maria Islam, Indika Edirisinghe and Britt Burton-Freeman \***

Department of Food Science and Nutrition, Center for Nutrition Research, Institute for Food Safety and Health, Illinois Institute of Technology, Chicago, IL 60616, USA;  
asandhu2@iit.edu (A.K.S.); mislam17@hawk.iit.edu (M.I.); iedirisi@iit.edu (I.E.)

\* Correspondance : bburton@iit.edu; Tel.: +1-708-341-7078

**Supplementary Table S1: Phytochemicals in Figs**

| First Author<br>Year     | Study type                          | Study methods                                                                                                                    | Fig<br>type/varieties                                               | Geographic<br>al location | Major findings                                                                                                                                                                                                                                                                                                                                                                                                                                                                                                                                                                                                            |
|--------------------------|-------------------------------------|----------------------------------------------------------------------------------------------------------------------------------|---------------------------------------------------------------------|---------------------------|---------------------------------------------------------------------------------------------------------------------------------------------------------------------------------------------------------------------------------------------------------------------------------------------------------------------------------------------------------------------------------------------------------------------------------------------------------------------------------------------------------------------------------------------------------------------------------------------------------------------------|
| Hoxha L<br>2022 [68]     | Harvesting<br>effect                | PCs: TPC, TFC, TAC<br>AOX: ABTS<br>Physico-chemical<br>parameters                                                                | 2 fig varieties<br><br>Black and white                              | Albania                   | TPC and AOX decrease continuously during fruit<br>development and ripening with 1.91-fold<br><br>and 2.45-fold decreases observed in the second<br>and third stage of maturation, respectively,<br>compared to the first one.<br><br>Black varieties had highest TPC and AOX                                                                                                                                                                                                                                                                                                                                              |
| Karantzi AD<br>2021 [48] | PCs at different<br>ripening stages | Color<br><br>PCs: anthocyanins<br>and phenolic acids<br>by HPLC-DAD<br><br>AOX: FRAP<br><br>Total chlorophyll<br>and carotenoids | 3 fig varieties<br><br>Four ripening<br>stages<br><br>Pulp and peel | Greece                    | Gallic acid was the prominent acid in flesh and<br>cyanidin- <i>O</i> -3-rutinoside the major anthocyanin in<br>pulp and peel in all varieties<br><br>2,4-dihydroxybenzoic (2,4-DHB), 2,3-<br>dihydroxybenzoic (2,3-DHB) and sinapic acids, and<br>the anthocyanins delphinidin-3- <i>O</i> -glucoside,<br>petunidin-3- <i>O</i> -glucoside in flesh and malvidin- <i>O</i> -<br>glucoside in pulp and peel were identified for the<br>first time in figs<br><br>PCs, carotenoids and AOX didn't change with<br>ripening in pulp but significant increase in<br>anthocyanins was observed in peel of all the<br>varieties |

|                                 |                                                         |                                                                                                                                                                                                                                                 |                                                       |       |                                                                                                                                                                                                                                                                                                                                                                                              |
|---------------------------------|---------------------------------------------------------|-------------------------------------------------------------------------------------------------------------------------------------------------------------------------------------------------------------------------------------------------|-------------------------------------------------------|-------|----------------------------------------------------------------------------------------------------------------------------------------------------------------------------------------------------------------------------------------------------------------------------------------------------------------------------------------------------------------------------------------------|
| Tewari D<br>2021 [60]           | Extraction<br>comparison<br>using various<br>techniques | Extraction:<br>methanol, boiling<br>water and soxhlet<br>using methanol<br><br>PCs: TPC, TFC<br><br>UHPLC-ESI-MS<br><br>AOX: DPPH, FRAP,<br>ABTS, CUPRAC,<br>phosphomolybden<br>um, and chelating<br>tests<br><br>Enzyme inhibitory<br>activity | Wild Himalayan<br>fig ( <i>F. palmata</i><br>Forssk.) | India | TPC: water extraction > Soxhlet > methanol<br><br>TFC: methanol > Soxhlet > water extraction<br><br>Highest number of compounds identified in<br>methanol extract (43) followed by Soxhlet (41) and<br>water extracts (37)<br><br>DPPH and ABTS radical scavenging highest in<br>aqueous extract<br><br>Methanol extracts had better enzyme inhibitory<br>activity compared to water extract |
| Paramananda<br>m V<br>2021 [74] | Drying effect                                           | Drying methods:<br>sun drying (SD),<br>hot-air drying (HD)<br>and microwave<br>drying (MD)<br><br>Proximate<br>composition<br><br>PCs: TPC, TFC, TTC<br><br>HPLC-DAD<br><br>AOX: FRAP, DPPH,<br>ABTS                                            | Roxburgh fig<br>( <i>Ficus auriculata</i><br>Lour.)   | India | After HD:<br><br>↑ carbohydrates<br><br>↑ proteins<br><br>↑ amino acids<br><br>↑ gallic acid<br><br>After MD:<br><br>↑ Caffeic acid, rutin<br><br>↑ AOX<br><br>↑ Nutritional value                                                                                                                                                                                                           |

|                        |                                                         |                                                                                                                                       |                                                                      |         |                                                                                                                                                                                                                                                                                                                                                                                                                                       |
|------------------------|---------------------------------------------------------|---------------------------------------------------------------------------------------------------------------------------------------|----------------------------------------------------------------------|---------|---------------------------------------------------------------------------------------------------------------------------------------------------------------------------------------------------------------------------------------------------------------------------------------------------------------------------------------------------------------------------------------------------------------------------------------|
|                        |                                                         | Scanning electron microscope (SEM) imaging                                                                                            |                                                                      |         | SEM: MD showed a looser porous structure, good for preservation                                                                                                                                                                                                                                                                                                                                                                       |
| Hssaini L<br>2021 [16] | Variety comparison                                      | <p>Fruit peel color</p> <p>PCs: TPC</p> <p>AOX: ABTS, DPPH, FRAP</p> <p>Sugar and organic acid by HPLC</p> <p>FTIR fingerprinting</p> | <p>11 fig varieties</p> <p>Lyophilized figs used in powder form.</p> | Morocco | <p>FTIR analysis displayed six major fingerprints</p> <p>Significant variability between fruit peel color, sugars, organic acids, AOX and TPC among the 11 varieties (<math>p &lt; 0.001</math>)</p> <p>Malic acid was the most abundant organic acid in all samples</p> <p>AOX by DPPH&gt;FRAP</p>                                                                                                                                   |
| Hssaini L<br>2021 [42] | Chemical and chemometric approach to fig peels and pulp | <p>Color by colorimeter</p> <p>PCs: TPC, TAC, TFC, TPAC</p> <p>HPLC-DAD</p> <p>AOX: ABTS, DPPH</p>                                    | <p>25 Fig varieties</p> <p>Peel and pulp</p>                         | Morocco | <p>The fig peels and pulps color showed significant differences among varieties at <math>p &lt; 0.001</math>, with the exception of the pulp lightness coordinate (<math>L^*</math>)</p> <p>Significant variation in TPC, TAC, TFC, TPAC among various varieties.</p> <p>PCs &gt; 2 times higher in peel than pulp</p> <p>AOX: Peel &gt; pulp</p> <p>HPLC-DAD: 12 compounds identified in peel and 8 in pulp of various varieties</p> |

|                         |                                                                             |                                                                                                                                                                                          |                                                                                                |         |                                                                                                                                                                                                                                                    |
|-------------------------|-----------------------------------------------------------------------------|------------------------------------------------------------------------------------------------------------------------------------------------------------------------------------------|------------------------------------------------------------------------------------------------|---------|----------------------------------------------------------------------------------------------------------------------------------------------------------------------------------------------------------------------------------------------------|
| Lachtar D<br>2021 [75]  | Drying effects<br>on figs quality                                           | Drying methods:<br>open air solar<br>drying and<br>greenhouse solar<br>drying<br>Fruit color<br><br>Mineral content by<br>atomic absorption<br>spectroscopy<br><br>PCs: TPC<br>AOX: DPPH | 2 fig varieties                                                                                | Tunisia | Green house drying improved fig color<br><br>Green house drying ↑ TPC and AOX, color and ↓<br>trace elements in both varieties                                                                                                                     |
| Gündeşli M<br>2021 [24] | Polyphenolic<br>composition at<br>4 different<br>harvesting time<br>periods | PCs: TPC, TFC, TAC<br><br>HPLC-DAD<br>AOX: DPPH                                                                                                                                          | Local fig variety                                                                              | Turkey  | 14 different phenolic compounds characterized at<br>different harvest periods.<br><br>Epicatechin (7.809 mg/100 g) was dominant.<br><br>TPC, TFC, TAC and AOX were highest at<br>the 1 <sup>st</sup> harvest and lowest at 4 <sup>th</sup> harvest |
| Aljane F<br>2020 [32]   | Phytochemicals<br>and AOX                                                   | PCs: TPC, TAC, TFC<br>AOX: ABTS and<br>DPPH<br><br>Reducing sugars:<br>HPLC-RID                                                                                                          | 27 fig varieties<br><br>Green-yellowish<br><br>Green<br><br>Red-greenish<br><br>Brown-purplish | Tunisia | Significant variation in the PCs, AOX and sugar<br>compositions (glucose and fructose) in the 27<br>Tunisian fig varieties.<br><br>Purplish black varieties had the highest TAC.                                                                   |

|                        |                                                                                 |                                                                                                                               |                                                        |          |                                                                                                                                                                                                                                                                                                                                                                                                              |
|------------------------|---------------------------------------------------------------------------------|-------------------------------------------------------------------------------------------------------------------------------|--------------------------------------------------------|----------|--------------------------------------------------------------------------------------------------------------------------------------------------------------------------------------------------------------------------------------------------------------------------------------------------------------------------------------------------------------------------------------------------------------|
|                        |                                                                                 |                                                                                                                               | Purple-greenish<br>Purple-blackish                     |          |                                                                                                                                                                                                                                                                                                                                                                                                              |
| Hssaini L<br>2020 [34] | Morphological assessments<br><br>Phenolic composition<br><br>Variety comparison | Morphological traits<br><br>organic acids, sugars<br><br>PCs: TPC, TFC, TAC<br>AOX: DPPH, FRAP and ABTS<br><br>color analysis | 11 fig varieties                                       | Morocco  | The variety 'Kadota' had the most promising morphological traits<br><br>Reducing sugars were same in all varieties<br><br>Malic acid predominant organic acid in all varieties<br><br>TPC, TFC and TAC highest in dark-colored varieties<br><br>TPAC highest in light skinned varieties.<br><br>DPPH and ABTS higher in light-colored figs, while, FRAP was generally higher in dark skin-colored varieties. |
| Ara I<br>2020 [37]     | PCs<br><br>AOX<br><br>Antidiabetic activity                                     | AOX: DPPH<br><br>PCs: HPLC-DAD<br><br>Anti-diabetic activities ( $\alpha$ -amylase inhibition)                                | 1 fig variety<br><br>pulp, peel and leaves             | Pakistan | Leaves>peel>pulp in TPC, AOX and $\alpha$ amylase inhibition                                                                                                                                                                                                                                                                                                                                                 |
| Zhang<br>2020 [56]     | Quality and morphology at different ripening stages                             | Morphological indices<br><br>Color and taste<br><br>Anthocyanins and organic acids: HPLC                                      | 6 fig varieties<br><br>Yellow<br><br>Red<br><br>Purple | China    | During the ripening of fig, malic acid, quinic acid, and citric acid were the main organic acids, followed by tartaric acid and succinic acid.<br><br>Fumaric acid present in lowest content.                                                                                                                                                                                                                |

|                         |                                                        |                                                                                                                                         |                                                                               |          |                                                                                                                                                                                                                                                                                                                                  |
|-------------------------|--------------------------------------------------------|-----------------------------------------------------------------------------------------------------------------------------------------|-------------------------------------------------------------------------------|----------|----------------------------------------------------------------------------------------------------------------------------------------------------------------------------------------------------------------------------------------------------------------------------------------------------------------------------------|
|                         |                                                        |                                                                                                                                         | Peel and pulp                                                                 |          | <p>The highest anthocyanin content was observed for cyanidin-3-<i>O</i>-glucoside, followed by cyanidin-3-<i>O</i>-rutoside, and cyanidin-3,5-diglucoside had the least content.</p> <p>There was change in accumulation pattern of organic acids at different ripening stages however, no changes observed in anthocyanins.</p> |
| Petkova N<br>2019 [76]  | Changes in phytochemicals                              | <p>Physicochemical parameters</p> <p>PCs: TCC, TPC, TFC, TAC</p> <p>AOX: DPPH, FRAP</p> <p>Sugars: HPLC-RID</p>                         | <p>1 yellow-green color fig variety</p> <p>fresh</p> <p>frozen</p> <p>jam</p> | Bulgaria | <p>The highest values of PCs, sugars and AOX were found in fresh fruits, while in frozen fruits their levels decreased significantly.</p> <p>The preparation of fig jam was a better approach for preserving some bioactive compounds, especially carotenoids and PCs.</p>                                                       |
| Hssaini L<br>2019 [35]  | Physio-biochemical screening                           | <p>PCs: TPC, TFC, TAC, TPAC</p> <p>Physicochemical parameters</p> <p>AOX: DPPH, ABTS and <math>\beta</math> carotene blanching test</p> | <p>135 varieties 94 local clones &amp; 41 imported varieties</p>              | Morocco  | <p>All analyses revealed significant variation among varieties</p> <p>Dark fig varieties highest TPC, TAC and AOX</p>                                                                                                                                                                                                            |
| Palmeira L<br>2019 [40] | Characterization of nutrients including phytochemicals | <p>Nutritional and chemical composition</p> <p>sugar analysis: HPLC-RID, organic</p>                                                    | <p>1 fig variety</p> <p>lyophilized ("Pingo de Mel")</p> <p>Peel and pulp</p> | Portugal | <p>Peel sample presented significantly higher contents of ash, fat and carbohydrates than the pulp</p> <p>Glucose, fructose, sucrose and threolose detected in both peel and pulp</p>                                                                                                                                            |

|                        |                           |                                                                                                                                                                                                                                                                                                                     |                                                                                                     |         |                                                                                                                                                                                                                                                                                                                                                                                                                                                                                                                   |
|------------------------|---------------------------|---------------------------------------------------------------------------------------------------------------------------------------------------------------------------------------------------------------------------------------------------------------------------------------------------------------------|-----------------------------------------------------------------------------------------------------|---------|-------------------------------------------------------------------------------------------------------------------------------------------------------------------------------------------------------------------------------------------------------------------------------------------------------------------------------------------------------------------------------------------------------------------------------------------------------------------------------------------------------------------|
|                        |                           | <p>acids by HPLC-PDA, tocopherols by HPLC-fluorescence detector, fatty acids by GC-FID</p> <p>AOX: DPPH, reducing power, <math>\beta</math> carotene bleaching assays,</p> <p>TBARS, and the oxidative haemolysis inhibition assay (OxHLIA)</p> <p>PCs: LC-DAD-ESI/MS<sup>n</sup></p> <p>Antibacterial activity</p> |                                                                                                     |         | <p>5 organic acids were identified and quantified namely oxalic, quinic, malic, citric, and succinic acids.</p> <p>Tocopherols detected in all their 4 forms</p> <p>23 fatty acids detected in samples</p> <p>12 &amp; 15PCs in pulp and peel, respectively.</p> <p>Rutin content highest in peel</p> <p>The peel presented significantly lower IC<sub>50</sub> values than pulp</p> <p>Fig peel is superior to the corresponding pulp in terms of nutritional and phenolic profiles as well as bioactivities</p> |
| Khadhraoui M 2019 [17] | Phytochemical composition | <p>PCs: TPC, TFC</p> <p>LC-MS and GC-MS</p> <p>AOX: ABTS, DPPH</p>                                                                                                                                                                                                                                                  | <p>9 sun-dried varieties</p> <p>Skin color varied</p> <p>Black</p> <p>Green-yellow</p> <p>green</p> | Tunisia | <p>Significant variations among the varieties in all analyses</p> <p>Dark fruits: higher TPC (~2.5 times higher) than green fruits</p> <p>Fatty acids (FA): palmitic, oleic, linoleic, linolenic and trace amounts of arachidic acid</p>                                                                                                                                                                                                                                                                          |



|                         |                                                                                              |                                                                                                                                                                                    |                                                                   |         |                                                                                                                                                                                                                                                                                                                          |
|-------------------------|----------------------------------------------------------------------------------------------|------------------------------------------------------------------------------------------------------------------------------------------------------------------------------------|-------------------------------------------------------------------|---------|--------------------------------------------------------------------------------------------------------------------------------------------------------------------------------------------------------------------------------------------------------------------------------------------------------------------------|
|                         |                                                                                              |                                                                                                                                                                                    | purple                                                            |         |                                                                                                                                                                                                                                                                                                                          |
| Mahmoudi S<br>2018 [41] | Proximate composition, phenolic composition, antioxidant capacity<br><br>Consumer acceptance | Pomological assessment, skin color, nutritional analysis, consumer acceptance test<br><br>PCs: TPC, TAC, TFC, CT (condensed tannin)<br><br>AOX: DPPH                               | 9 fresh fig varieties<br><br>Peel and pulp                        | Algeria | Skin color results indicate two groups (light skin and dark skin groups)<br><br>Organic acids in fig pulp > than peel<br><br>K and Ca two major minerals present in different varieties<br><br>Peel > than pulp in TPC, TAC, TFC, CT and AOX<br><br>Consumers preferred less sweet, juicier and easier to peel varieties |
| Meziant L<br>2018 [62]  | Extraction efficiency                                                                        | TAC<br><br>extraction variables: solvent, #extractions, solid-to-solvent ratio, extraction time, methanol conc., type of acidification, and acid-to-solvent ratio (1/99 to 20/80). | 1 fig variety<br><br>peel                                         | Algeria | Optimum extraction conditions for Anthocyanins:<br><br>Double extraction with 90% methanol acidified to a ratio of 10/90 with 5% citric acid using a solid-to-solvent ratio of 1/100 extraction time, 180 min<br><br>The extract yielded 346.63 mg monomeric anthocyanins per 100 g of dried fig peels.                  |
| Sedaghat S<br>2018 [83] | Enzyme activity, Sugar and organic acids                                                     | Chemical composition<br><br>Sugars and organic acids: HPLC                                                                                                                         | 1 fig variety with samples collected at 4 different stages over 2 | Iran    | Glucose and fructose significantly increased as fruits developed.<br><br>Citric acid was the most abundant organic acid followed by malic acid.                                                                                                                                                                          |

|                         |                                                   |                                                                                                                          |                                                                                     |                       |                                                                                                                                                                                                                                                                                                                              |
|-------------------------|---------------------------------------------------|--------------------------------------------------------------------------------------------------------------------------|-------------------------------------------------------------------------------------|-----------------------|------------------------------------------------------------------------------------------------------------------------------------------------------------------------------------------------------------------------------------------------------------------------------------------------------------------------------|
|                         |                                                   | Enzyme activity assays                                                                                                   | consecutive years                                                                   |                       | <p>Invertase activity increased sharply before the caprification stage up to the senescence stage.</p> <p>Fig fruit possess <math>\alpha</math>- and <math>\beta</math>-amylase activities, which increased up to the ripening stage and then slightly decreased at the senescence stage.</p>                                |
| Sedaghat S<br>2018 [70] | Physicochemical changes in fruit development      | <p>Color analysis, mineral analysis, crude fiber, aflatoxin</p> <p>PCs: TPC</p> <p>HPLC-DAD</p>                          | 1 fig variety with samples collected at 4 different stages over 2 consecutive years | Iran                  | <p>K and Fe high in dried fig on trees</p> <p>Total PCs decreased until fruit ripening, followed by an increase at the stage of senescence</p> <p>(+) Catechin, Chlorogenic acid, (–) Epicatechin and Quercetin-3-O- glucoside highest when the fruits dried on the trees.</p> <p>% crude fiber stable until development</p> |
| Mopuri R<br>2018 [39]   | Phytochemical extracts of figs metabolic syndrome | <p>PCs: TPC, TFC</p> <p>AOX: DPPH</p> <p>anti-diabetic and anti-obesogenic activity by enzymatic assays</p> <p>GC-MS</p> | <p>leaves and stembark from India</p> <p>Fruit from S. Africa</p>                   | India<br>South Africa | <p>Fruit extract significantly (<math>p &lt; 0.05</math>) &gt; than all other extracts and parts of the plant in terms of AOX, antidiabetic, and antiobesogenic effects</p> <p>GC-MS (13 components detected)</p>                                                                                                            |

|                            |                             |                                                                                                                                                                                                                                                      |                                                                             |          |                                                                                                                                                                                                                           |
|----------------------------|-----------------------------|------------------------------------------------------------------------------------------------------------------------------------------------------------------------------------------------------------------------------------------------------|-----------------------------------------------------------------------------|----------|---------------------------------------------------------------------------------------------------------------------------------------------------------------------------------------------------------------------------|
| Backes E<br>2018 [61]      | Extraction efficiency       | <p>solid-liquid extraction methods were optimized by response surface methodology</p> <p>selected techniques: heat extraction (HE), ultrasound assisted extraction (UAE), microwave extraction (ME)</p> <p>Anthocyanin analysis: HPLC-DAD-ESI/MS</p> | Lyophilized peel powder from 1 local variety                                | Portugal | <p>UAE of anthocyanins &gt; HE and ME</p> <p>UAE was the most effective method, yielding 3.82 mg C3R per g of the extracted residue at the optimal global extraction conditions (21 min, 310 W, and 100% of ethanol).</p> |
| Maghsoudlou E<br>2017 [18] | Extraction and AOX activity | <p>Sub-critical water extraction</p> <p>PCs: TPC, TFC</p> <p>AOX: DPPH, reducing power, rancimat tests</p> <p>Antioxidant potential in canola oil</p>                                                                                                | <p>2 fig varieties</p> <p>Pulp and skin</p> <p>dark purple</p> <p>green</p> | Iran     | <p>AOX of dark variety extract &gt; green extract; AOX of skin extracts &gt; than pulp extracts.</p> <p>Dark fig skin extracts comparable to the synthetic antioxidant (TBHQ) for oxidative stability in canola oil</p>   |
| Pereira C<br>2017 [82]     | Physico-chemical and        | Nutrients & quality analysis at different                                                                                                                                                                                                            | 9 fig varieties                                                             | Spain    | Early ripening stage ↑ (fruit size, fiber, protein, TA of some varieties)                                                                                                                                                 |

|                      |                                         |                                                                                                                                                                    |                                                                        |        |                                                                                                                                                                                                                           |
|----------------------|-----------------------------------------|--------------------------------------------------------------------------------------------------------------------------------------------------------------------|------------------------------------------------------------------------|--------|---------------------------------------------------------------------------------------------------------------------------------------------------------------------------------------------------------------------------|
|                      | nutritional characterization            | ripening stages<br>Organic acids                                                                                                                                   |                                                                        |        | Later ripening ↑ (TSS, MI, color intensity.)<br>↔ organic acids between varieties and ripening stages                                                                                                                     |
| Ersoy N<br>2017 [19] | Physico-chemical properties             | Various physico-chemical properties<br>AOX: DPPH, Fe <sup>2+</sup> chelating and H <sub>2</sub> O <sub>2</sub> scavenging activity and metal chelating<br>PCs: TPC | 4 fig varieties<br>Black<br>Purple<br>Green<br>yellow                  | Turkey | Significant differences in physico-chemical properties, AOX and TPC among 4 varieties<br><br>Varieties with dark colors had higher AOX and PCs than those with lighter color.                                             |
| Konak R<br>2017 [20] | Drying method effects                   | Oven vs sun drying<br>AOX: TEAC, ABTS<br>PCs: TPC                                                                                                                  | 4 fig varieties<br>2 dark-colored (black) and 2 light-colored (yellow) | Turkey | TPC, AOX of fresh dark figs > fresh light figs<br><br>TPC of dried dark figs > light figs<br><br>However, AOX of dried dark figs < light figs<br><br>No effect of sun or oven drying on TPC, AOX in 3 out 4 fig varieties |
| Wang Z<br>2017 [71]  | Metabolomic and transcriptomic analyses | HPLC-ESI-QQQ/MS/MS<br>RNA sequencing<br>Real time quantitative PCR                                                                                                 | 2 fig varieties                                                        | China  | 5 and 22 metabolites were identified as having significantly different contents between fruit peels of the two varieties at young and mature stages, respectively.                                                        |

|                             |                                                          |                                                                                                                                                  |                        |          |                                                                                                                                                                                                                                            |
|-----------------------------|----------------------------------------------------------|--------------------------------------------------------------------------------------------------------------------------------------------------|------------------------|----------|--------------------------------------------------------------------------------------------------------------------------------------------------------------------------------------------------------------------------------------------|
|                             |                                                          |                                                                                                                                                  |                        |          | <p>Significant variation in accumulation of various flavonoids including anthocyanins at young and mature stages.</p> <p>Upregulation and down regulation of genes involved in flavonoid biosynthesis pathway based on maturity stages</p> |
| Bey MB<br>2016 [73]         | Sun drying effects                                       | <p>Physico-chemical parameters</p> <p>AOX: ABTS, ferric reducing power, <math>\beta</math>-carotene-linoleic acid assay</p> <p>PCs: HPLC-DAD</p> | 3 dark fig varieties   | Algeria  | <p>22 PCs identified</p> <p>Sun drying</p> <p>↑ sugar content</p> <p>↓ PCs</p> <p>↓ AOX</p> <p>↓ Flavonoids by 86% with complete loss of C3G and C3R</p>                                                                                   |
| Pourghayoumi M<br>2016 [15] | Comparison of varieties phenolic content and composition | <p>PCs: TPC, TFC, TAC</p> <p>HPLC-UV/vis</p> <p>AOX: DPPH</p> <p>TSS, color parameters</p>                                                       | 9 dried fig varieties  | Iran     | <p>Significant differences were determined among the varieties with respect to the distribution of PCs</p> <p>AOX: no significant differences observed except for one variety</p> <p>TAC negligible in all varieties</p>                   |
| Ajmal M<br>2016 [36]        | Nutritional characterization                             | <p>Proximate analysis</p> <p>PCs: TPC, TFC, TAC</p>                                                                                              | 1 fig variety<br>Black | Pakistan | <p>PCs in figs leaves&gt;peel&gt;pulp</p> <p>C3R highest in peel extract</p>                                                                                                                                                               |

|                          |                                                                     |                                                                                                                |                                                                                 |         |                                                                                                                                                                                                                                                     |
|--------------------------|---------------------------------------------------------------------|----------------------------------------------------------------------------------------------------------------|---------------------------------------------------------------------------------|---------|-----------------------------------------------------------------------------------------------------------------------------------------------------------------------------------------------------------------------------------------------------|
|                          | hypoglycemic potential                                              | HPLC for cyanidine-3-rutinoside (C3R)<br>AOX: FRAP, DPPH<br>Hypoglycemic potential (Rat study for 56 days)     | leaves, peel and pulp                                                           |         | Leaf extracts highest AOX and alleviates the glucose and insulin levels in rats                                                                                                                                                                     |
| Wojdyło A<br>2016 [44]   | Comparison of anti-diabetic and AOX of different varieties of figs  | antidiabetic effects<br>polyphenolic and triterpenic composition: LC-MS QTOF<br>AOX: ORAC<br>sugar composition | 10 different varieties with 2 types (brevas and figs)                           | Spain   | Phenolic compounds varied significantly by variety<br>11 PCs were identified<br>Betulinic acid was the main triterpenoid followed by oleanolic acid.<br>ORAC/AOX- highest in Verdal brevas<br>Anti-diabetic enzyme inhibition varied with varieties |
| Harzallah A<br>2016 [21] | Phytochemical content and AOX of juices from different parts of fig | PCs: TPC, TFC, total ortho-diphenols content, TAC, TTC<br>AOX: DPPH, reducing power assay                      | 3 Fig varieties<br>Green, purple, black<br>Juices of peel, pulp and whole fruit | Tunisia | Black peel and fruit juice highest AOX<br>With ripening ↑ AOX ↑ PCs                                                                                                                                                                                 |
| Hoxha L<br>2016 [31]     | PCs and AOX Breba and main crop                                     | PCs: TPC, TAC, TFC<br>AOX: DPPH, ABTS                                                                          | 2 fresh fig varieties<br>Purple<br>Green                                        | Albania | The main crop of both varieties had higher TPC compared to breba crop.<br>Dark variety and peel had higher AOX, TFC and TPC                                                                                                                         |

|                      |                                                                                 |                                                                                                                                                                            |                                                                  |         |                                                                                                                             |
|----------------------|---------------------------------------------------------------------------------|----------------------------------------------------------------------------------------------------------------------------------------------------------------------------|------------------------------------------------------------------|---------|-----------------------------------------------------------------------------------------------------------------------------|
|                      |                                                                                 |                                                                                                                                                                            | Whole fruit,<br>pulp and peel                                    |         |                                                                                                                             |
| Hoxha L<br>2015 [22] | AOX of dried<br>autochthonous<br>figs                                           | PCs: TPC, TAC, TFC<br>AOX: DPPH, ABTS                                                                                                                                      | 5 Fig varieties<br><br>Yellow, green,<br>brown, purple,<br>black | Albania | TPC, TAC, AOX, TFC higher in dark compared to light<br>fig varieties.                                                       |
| Bey MB<br>2015 [23]  | Phytochemical<br>content and<br>AOX of dried<br>dark and light<br>fig varieties | PCs: TPC, TAC, TFC,<br>TPAC and flavanol<br>content<br>AOX-DPPH, H <sub>2</sub> O <sub>2</sub><br>and O <sub>2</sub> scavenging<br>effects<br>phosphomolybden<br>um assays | 9 dried Fig<br>varieties<br><br>3 dark<br><br>6 light            | Algeria | Dark fruits had higher PCs, AOX compared to light<br>fruits<br><br>High correlation between AOX and phytochemical<br>assays |
| Feng YC<br>2015 [58] | Purification of<br>phenolic<br>compounds                                        | total sugars<br>PCs: TPC<br>AOX: ABTS, FRAP<br><br>Purification<br>parameters<br>optimization,<br><br>MEKC                                                                 | 1 fig variety                                                    | China   | Increased AOX, catechin, epicatechin, chlorogenic<br>acid, and rutin after purification compared to crude<br>extract        |

|                          |                                                      |                                                                                                                                                  |                                                                               |         |                                                                                                                                                                                                                                                                                                                                                       |
|--------------------------|------------------------------------------------------|--------------------------------------------------------------------------------------------------------------------------------------------------|-------------------------------------------------------------------------------|---------|-------------------------------------------------------------------------------------------------------------------------------------------------------------------------------------------------------------------------------------------------------------------------------------------------------------------------------------------------------|
| Ammar S<br>2015 [49]     | Phenolic compound and AOX                            | AOX: TEAC, FRAP, ORAC<br>PCs: TPC<br>UHPLC-DAD-MS                                                                                                | 2 fig varieties<br><br>Black and green<br><br>leaves, fruits, skins and pulps | Tunisia | 116 compounds characterized in different parts<br>Leaves of both green and dark high in PCs<br>Rutin- main component in fruits, skin & leaves<br>prenylhydroxygenistein-major component in pulp<br>9 anthocyanins characterized: cyanidin 3-rutinoside and cyanidin 3,5-diglucoside major ones<br>Good correlation between (AOX, TP, PCs)             |
| Kamiloglu S<br>2015 [52] | Effect of sun drying on PCs<br><br>Bio-accessability | PCs: TPC, TFC, TPAC, TAC<br>HPLC-PDA<br>AOX: DPPH, ABTS, FRAP, cupric ion reducing antioxidant capacity (CUPRAC)<br><i>In vitro</i> GI digestion | 2 fig varieties<br><br>Yellow and purple                                      | Turkey  | 14 phenolic compounds were analyzed<br>Rutin and cyanidin-3-rutinoside were major flavonol and anthocyanin, in both varieties, respectively<br>Yellow figs: higher TFC and TPAC<br>Sun drying ↓ TPC, TAC, AOX<br>Bio-accessability of PCs: high for skin of both varieties; ↓ after sun drying in pulp                                                |
| Qin H<br>2015 [63]       | Ultrasound assisted extraction (UAE)                 | Ionic liquid-based UAE<br>Optimization parameters: extraction solvent concentration, solid/liquid ratio, extraction time and temp                | The leaves, pulps, and peels of fig<br><br>Variety not provided               | China   | UAE was used to extract gallic acid, chlorogenic acid, rutin, psoralen, and bergapten from different parts of fig fruit.<br><br>Maximum extraction of PCs was achieved with these optimal conditions: e.g., with 1.0 M [BMIM][PF <sub>6</sub> ], solid–liquid ratio of 1:50, ultrasound extraction time of 30 min and extraction temperature of 30 °C |



|                      |                                                        |                                                                                                                                      |                                             |                           |                                                                                                                                                                               |
|----------------------|--------------------------------------------------------|--------------------------------------------------------------------------------------------------------------------------------------|---------------------------------------------|---------------------------|-------------------------------------------------------------------------------------------------------------------------------------------------------------------------------|
|                      |                                                        | HPLC-UV                                                                                                                              |                                             |                           |                                                                                                                                                                               |
| Trad M<br>2014 [55]  | Nutritive and polyphenol content comparison            | Sugars, organic acids and alcohol insoluble solids<br>PCs: HPLC-DAD                                                                  | 5 fig varieties<br>2 dark<br>3 yellow green | Tunisia                   | Glucose and fructose major sugars<br>Citric acid major organic acid in all varieties<br>Cyanidin-3-rutinoside was the most abundant compound among all varieties              |
| Debib A<br>2014 [65] | AOX and antimicrobial activity<br><br>Extraction       | Extraction: methanol, water, petroleum ether and acetone<br><br>Antimicrobial activity<br>AOX-DPPH<br>PCs: TPC, TFC & tannin content | 2 dried fig varieties                       | Algeria                   | High AOX of methanol extract of Ajendar variety<br>High Antimicrobial activity of methanolic extract of Taamriout variety<br>High TPC and TFC in acetone and aqueous extracts |
| Jokić S<br>2014 [66] | Comparison of PCs extraction                           | PCs: TPC, TFC<br>Color analysis<br>Ultrasound assisted Extraction (UAE)<br>Solid-liquid extraction (SLE)                             | 5 dried fig varieties                       | Croatia                   | TPC&TFC: UAE>SLE<br>Significant differences in TPC and TFC in 5 different fig varieties<br>Color changes in extracts ↓ by UAE<br>The darker varieties had highest TPC and TFC |
| Russo F<br>2014 [45] | PCs comparison in different varieties, fresh vs dried, | TPC<br>HPLC-UV/DAD                                                                                                                   | 19 fig samples                              | Italy<br>Turkey<br>Greece | Fig peel high in PCs<br>Significant qual and quant differences in PCs among fresh/dried fig samples from different origins                                                    |

|                      |                                                            |                                                                                                                                                                                            |                                                                                                                  |          |                                                                                                                                                                                                             |
|----------------------|------------------------------------------------------------|--------------------------------------------------------------------------------------------------------------------------------------------------------------------------------------------|------------------------------------------------------------------------------------------------------------------|----------|-------------------------------------------------------------------------------------------------------------------------------------------------------------------------------------------------------------|
|                      | different regions and breba vs full crop                   |                                                                                                                                                                                            | 9 fresh "Dottato" fig samples<br><br>from Italy, 10 dried fig samples from Italy (2), Turkey (6), and Greece (2) |          | First crop richer in PCs than the 2nd crop.<br><br>Turkish dried figs had the highest amount of PCs                                                                                                         |
| Sadia H<br>2014 [79] | Nutrient and mineral content                               | Proximate composition<br><br>Mineral analysis by AAS.                                                                                                                                      | 3 fig varieties                                                                                                  | Pakistan | Significant variation existed among the selected fig varieties in all the nutritional parameters<br><br>Na, K and Mg major minerals in figs                                                                 |
| Soni N<br>2014 [86]  | Nutritional, phytochemical, AOX and antibacterial activity | Nutritional content<br><br>PCs: TPC, TFC, crude alkaloids and saponins<br><br>GC-MS screening of volatile and semi-volatile compounds<br><br>AOX: FRAP, ABTS<br><br>Antibacterial activity | Dried figs purchased from local market                                                                           | India    | Dried fig good source of minerals like Sr, Ca, Mg, P and Fe.<br><br>vitamin E, $\beta$ -amyirin, stigmasterol, campesterol, oleic acid, isoamyl laurate and $\gamma$ tocopherols were identified with GC-MS |

|                       |                                               |                                                                                                                                                                                                                                                           |                                                          |         |                                                                                                                                                                                                                                                                                                                         |
|-----------------------|-----------------------------------------------|-----------------------------------------------------------------------------------------------------------------------------------------------------------------------------------------------------------------------------------------------------------|----------------------------------------------------------|---------|-------------------------------------------------------------------------------------------------------------------------------------------------------------------------------------------------------------------------------------------------------------------------------------------------------------------------|
| Tanwar B<br>2014 [77] | Processing into<br>fig jam and<br>nectar      | Nutritional analysis<br><br>Physicochemical<br>analysis<br><br>PCs: TPC, TFC, TAC,<br>TTC                                                                                                                                                                 | Figs purchased<br>from local<br>market                   | India   | Processing of fig fruit pulp into jam and nectar<br>resulted in a significant ( $p<0.05$ ) increase in<br>physicochemical properties like TSS and TA, but a<br>significant ( $p<0.05$ ) decrease in pH, iron, calcium<br>and phosphorus; TPC, TFC, TAC, TTC, beta carotene,<br>crude fiber, protein, fat, and vitamin C |
| Bey MB<br>2014 [67]   | Optimization of<br>recovery of PCs<br>and AOX | Response surface<br>methodology<br><br>3 variables: solvent<br>concentration,<br>temperature and<br>time<br><br>TPC and AOX by<br>DPPH                                                                                                                    | 1 dried dark fig<br>variety                              | Algeria | The optimal extraction parameters were 61.03%<br>acetone, 105.12 min, and 46.16°C.                                                                                                                                                                                                                                      |
| Bey MB<br>2013 [64]   | Extraction<br>optimization<br>and efficiency  | solvents (acetone,<br>ethanol, methanol<br>and water)<br>comparison for the<br>extraction of PCs.<br><br>Extraction<br>parameters:<br>solvent type,<br>solvent<br>concentration, acid<br>concentration,<br>extraction time and<br>temp,<br>sample/solvent | 2 fig varieties<br><br>Light (green)<br><br>Dark (black) | Algeria | All extraction parameters<br><br>had significant effects ( $p<0.05$ ) on the TPC and AOX<br><br><br>Optimized conditions: double extraction using 60%<br>acetone without acidification, at 40°C for 120 min,<br>and with a 1/75 solid to solvent ratio                                                                  |

|                            |                                          |                                                                                                             |                                                                                                  |        |                                                                                                                                                                                       |
|----------------------------|------------------------------------------|-------------------------------------------------------------------------------------------------------------|--------------------------------------------------------------------------------------------------|--------|---------------------------------------------------------------------------------------------------------------------------------------------------------------------------------------|
|                            |                                          | ratio and no. of extractions<br><br>TPC & DPPH-test conducted to determine the extraction efficiencies      |                                                                                                  |        |                                                                                                                                                                                       |
| Kamiloglu S<br>2013 [89]   | Bio- accessibility of PCs.               | <i>in vitro</i> -simulated GI tract digestion<br><br>AOX: DPPH, FRAP, ABTS<br><br>PCs: TPAC<br><br>HPLC-PDA | 2 fig varieties<br><br>Purple<br><br>Yellow<br><br>skin, pulp, whole-fresh and whole-dried fruit | Turkey | Sun-drying of fig fruit might result in an ↑ bio-accessibility of TPAC and chlorogenic acid content as well as AOX.<br><br>Anthocyanin bio-accessibility ↓ as a result of sun-drying. |
| Nakilcioğlu E<br>2013 [46] | PCs in Sarilop fig type                  | PCs: TPC, TFC<br><br>HPLC-DAD<br><br>AOX: DPPH, FRAP                                                        | 10 fig varieties<br><br>Fresh and dried                                                          | Turkey | PCs in fresh fig > dried figs<br><br>major compound: (-)-epicatechin<br><br>Significant differences in different fig varieties from different regions of Turkey                       |
| Vemmos S<br>2013 [85]      | Seasonal changes in carbohydrate content | Carbohydrate analysis: HPLC-RID                                                                             | 3 fig varieties<br><br>Fruit, leaves                                                             | Greece | The main sugars found in leaves & fruits of the three varieties were sucrose, glucose and fructose<br><br>Compared to other sugars sucrose > in leaves while < in fruits              |

|                              |                |                                                                                                                               |                                                                                                                                                   |         |                                                                                                                                                                                                                                                                                                                                                  |
|------------------------------|----------------|-------------------------------------------------------------------------------------------------------------------------------|---------------------------------------------------------------------------------------------------------------------------------------------------|---------|--------------------------------------------------------------------------------------------------------------------------------------------------------------------------------------------------------------------------------------------------------------------------------------------------------------------------------------------------|
|                              |                |                                                                                                                               |                                                                                                                                                   |         | At fruit maturation concentration of sugars ↑                                                                                                                                                                                                                                                                                                    |
| Ercisli S<br>2012 [33]       | Color<br>AOX   | PCs: TPC, TAC<br>AOX: TEAC, FRAP<br>Color analysis<br>TTA and SSC                                                             | A total of 24<br>local fig<br>genotypes and<br>two standard fig<br>varieties<br><br>(Sarilop and<br>Bursa Siyahi)<br><br>Light and dark<br>colors | Turkey  | Fruit skin color of genotypes were found to be very<br>diverse, i.e., light green, light purple, purple, dark<br>purple and black.<br><br>Lot of variation in fig genotypes based on studied<br>parameters<br><br>Black/dark colored fig genotypes high in TPC, TAC<br>and AOX<br><br>Local fig genotypes had higher AOX than other<br>genotypes |
| Ouchemoukh<br>S<br>2012 [43] | AOX activity   | AOX: DPPH,<br>reducing power &<br>phosphomolybden<br>um method<br><br>PCs: TPC, TAC, TFC,<br>TC, TPAC                         | Black fig variety<br>along with other<br>dried fruits                                                                                             | Algeria | Apricots & figs high in carotenoids<br><br>Figs had the highest concentration of TPC & TFC<br>compared to other dried fruits                                                                                                                                                                                                                     |
| Mujic I<br>2012 [51]         | AOX properties | Freeze dried fig<br>extracts-70%<br>methanol and 70%<br>ethanol-compared<br><br>PCs: TPC, TFC<br><br>HPLC-MS<br><br>AOX: DPPH | 5 fig varieties                                                                                                                                   | Croatia | Methanol extracts better for TPC<br><br>Rutin was detected in all five samples, with<br>HPLC/MS                                                                                                                                                                                                                                                  |

|                            |                                            |                                                                                                                              |                                                                                                                   |         |                                                                                                                                                                                                                                                                                                   |
|----------------------------|--------------------------------------------|------------------------------------------------------------------------------------------------------------------------------|-------------------------------------------------------------------------------------------------------------------|---------|---------------------------------------------------------------------------------------------------------------------------------------------------------------------------------------------------------------------------------------------------------------------------------------------------|
| Vallejo F<br>2012 [12]     | PCs in dried & fresh figs                  | PCs: TPC,<br>LC–UV-DAD/ESI-<br>MS <sup>n</sup>                                                                               | 18 fresh fig<br>varieties and 3<br>dried fig<br>varieties<br><br>Dark and green<br>varieties<br><br>Peel and pulp | Spain   | PCs in 1 <sup>st</sup> crop > 2 <sup>nd</sup> crop<br><br>PCs > in skin of fresh figs compared to pulp<br><br>Skin: mainly anthocyanins<br><br>pulp: mainly proanthocyanidins<br><br>C-glycosides were detected for the first time                                                                |
| Faleh E<br>2012 [50]       | Phenolic profile<br>variability            | AOX: DPPH, NO<br>and O <sub>2</sub> <sup>-</sup> scavenging<br>activity<br><br>HPLC-DAD                                      | 17 dried fig<br>varieties<br><br>green, red and<br>black                                                          | Tunisia | quercetin-3-O-rutinoside was the major compound<br>quantified.<br><br>All fig varieties exhibited AOX against DPPH and O <sub>2</sub> <sup>-</sup><br>radical in a concentration dependent way<br><br>Only “Hammouri” variety presented some capacity<br>to scavenge NO radical.                  |
| Yemiş O<br>2012 [54]       | Pigment profile<br>and surface<br>color    | Anthocyanin &<br>Carotenoid<br>composition<br><br>Sun drying<br><br>Color: hunter lab<br>system<br><br>HPLC/DAD &<br>HPLC/MS | 5 fig varieties<br><br>Green<br><br>Yellow<br><br>Purple                                                          | Turkey  | cyanidin-3-rutinoside (major anthocyanin)<br><br>In yellow fig varieties; lutein, zeaxanthin, β-<br>cryptoxanthin and β-carotene major carotenoids<br><br>~ 80% of carotenoid compounds in yellow fig<br>varieties degraded at the end of drying<br><br>Browning of figs observed upon sun-drying |
| Bucić-Kojić A<br>2011 [59] | Extraction<br>conditions<br>effects on PCs | Diff. aqueous<br>ethanol<br>concentrations,<br>extraction temp                                                               | 5 fig varieties                                                                                                   | Croatia | Best extraction conditions: (80%, v/v aqueous<br>ethanol, 80°C)<br><br>The highest TPC was found in Crnica fig variety<br>while the lowest in fig variety Bjelica.                                                                                                                                |

|                         |                                                                          |                                                                                                                                                               |               |          |                                                                                                                                                                                                                                                               |
|-------------------------|--------------------------------------------------------------------------|---------------------------------------------------------------------------------------------------------------------------------------------------------------|---------------|----------|---------------------------------------------------------------------------------------------------------------------------------------------------------------------------------------------------------------------------------------------------------------|
|                         |                                                                          | PCs: TPC, TFC, TPAC<br>AOX: DPPH                                                                                                                              |               |          |                                                                                                                                                                                                                                                               |
| Marrelli M<br>2012 [69] | Changes in PCs and lipophilic composition at different harvesting stages | PCs: TPC<br>GC-MS<br>free radical scavenging activity, $\beta$ -carotene bleaching assay, photodynamic cytotoxicity & pancreatic lipase activity              | 1 fig variety | Italy    | Fruits of the first harvest furanocoumarins pyranocoumarins while fruits in September highest TPC.<br><br>antiradical & lipid peroxidation activity exhibited by fruits from first harvest<br><br>Dichloromethane fractions highest photodynamic cytotoxicity |
| Slatnar, A<br>2011 [72] | Drying effects on fig nutrients and PCs                                  | Comparison of drying methods (oven vs sun drying)<br><br>Two harvesting times<br><br>Organic acids and sugars<br><br>PCs: TPC<br><br>HPLC-MS<br><br>AOX: DPPH | 1 fig variety | Slovenia | Organic acids and sugars high in dried figs compared to fresh figs<br><br>The predominant phenolic compound was epicatechin in all samples<br><br>Oven drying provided higher concentration PCs compared to sun dried samples                                 |

|                          |                                                            |                                                                                                                                                                                |                                                                                                                             |        |                                                                                                                                                                                                                                                                    |
|--------------------------|------------------------------------------------------------|--------------------------------------------------------------------------------------------------------------------------------------------------------------------------------|-----------------------------------------------------------------------------------------------------------------------------|--------|--------------------------------------------------------------------------------------------------------------------------------------------------------------------------------------------------------------------------------------------------------------------|
| Caliskan O,<br>2011 [25] | Phytochemical<br>&<br>AOX properties                       | PCs: TPC, TAC<br>HPLC<br>AOX: FRAP<br>sugar analysis<br>skin color analysis                                                                                                    | 76 Fig<br>accessions<br><br>Diff colors:<br>green<br>yellow<br>brown<br>purple<br>black                                     | Turkey | Black figs higher AOX, TPC, TAC compared to other<br>fig accessions<br><br>Fig accessions displayed variable TPC, AOX, and TAC<br>profiles depending on fruit skin color<br><br>Fructose& glucose predominant sugars<br><br>Good correlation between the TPC & AOX |
| Pande G,<br>2010 [47]    | Organic acids,<br>sugars, fatty<br>acid profile and<br>PCs | PCs: TPC<br>HPLC<br>AOX: FRAP, TEAC<br>organic acids,<br>sugars: HPLC<br>fatty acid profile:<br>GC-FID<br>total carotenoids,<br>phytosterols,<br>tocopherols,<br>phospholipids | 1 fig variety<br><br>peel, pulp<br>containing<br>minute<br><br>inseparable<br>seeds, and<br>edible portion<br>(whole fruit) | USA    | Major organic acid: malic acid<br><br>Major phenolic acid: gallic and ellagic acid<br><br>Major flavonoid: catechin<br><br>Predominant fatty acid: Linoleic acid                                                                                                   |



|                           |                                                             |                                                                                                                                                                          |                                                                    |          |                                                                                                                                                                                                                                                                                                                                                                                                                                                  |
|---------------------------|-------------------------------------------------------------|--------------------------------------------------------------------------------------------------------------------------------------------------------------------------|--------------------------------------------------------------------|----------|--------------------------------------------------------------------------------------------------------------------------------------------------------------------------------------------------------------------------------------------------------------------------------------------------------------------------------------------------------------------------------------------------------------------------------------------------|
| Oliveira AP,<br>2009 [38] | Phytochemical<br>composition<br>and biological<br>potential | PCs and organic<br>acids: HPLC-<br>DAD/UV<br><br>AOX: DPPH, O <sub>2</sub> <sup>-</sup> , NO<br><br>Antimicrobial<br><br>acetylcholinesteras<br>e inhibitory<br>capacity | 2 fig varieties<br><br>White<br><br>Leaves, peels &<br>pulp        | Portugal | 7 PCs characterized<br><br>Similar phenolic profile in leaves, peels & pulp<br>samples<br><br>Organic acids in leaves: oxalic, citric, malic, quinic,<br>shikimic and fumaric acids<br><br>Organic acids peels and pulps: all of the above<br>except quinic acid<br><br>Only leaves exhibited AOX against O <sub>2</sub> <sup>-</sup> radical<br><br>None of the samples exhibited antimicrobial and<br>acetylcholinesterase inhibitory capacity |
| del Caro A,<br>2008 [27]  | Polyphenol<br>composition                                   | PCs: HPLC-DAD                                                                                                                                                            | 2 fresh fig<br>varieties<br><br>Black & green<br><br>Peel and pulp | Italy    | PCs highest in peels and black variety<br><br>Rutin present in high amounts in peel of both<br>varieties<br><br>C3R and C3G- anthocyanins in peel of black variety<br><br>Chlorogenic and cinnamic acids: present in peels of<br>both varieties<br><br>Benzoic acid & catechins not detected.                                                                                                                                                    |
| Piga A,<br>2008 [26]      | PCs analysis in<br>pulp & peel                              | PCs: HPLC-DAD                                                                                                                                                            | 2 fig varieties<br><br>Black & white<br><br>Peel and pulp          | Italy    | PCs highest in black fig variety and concentrated in<br>the peels especially flavonols and anthocyanins<br><br>Pulp: anthocyanins as the only PCs detected<br><br>Catechins: not detected in any variety                                                                                                                                                                                                                                         |
| Veberic R,<br>2008 [28]   | Fruit quality                                               | Sugars, organic<br>acids                                                                                                                                                 | 3 fresh fig<br>varieties                                           | Slovenia | No differences in summer & fall harvest crops<br><br>No differences in sugar & organic acid in 3 varieties                                                                                                                                                                                                                                                                                                                                       |

|                      |                                                      |                                                                      |                                                                |          |                                                                                                                                                                                                                                                                                                                                 |
|----------------------|------------------------------------------------------|----------------------------------------------------------------------|----------------------------------------------------------------|----------|---------------------------------------------------------------------------------------------------------------------------------------------------------------------------------------------------------------------------------------------------------------------------------------------------------------------------------|
|                      | different harvest times                              | PCs: TPC, HPLC<br>AOX: DPPH                                          | 1 white & 2 purple                                             |          | Dark varieties had higher AOX & TPC                                                                                                                                                                                                                                                                                             |
| Veberic R, 2008 [29] | Phytochemical composition<br>different harvest times | PCs: HPLC-PDA                                                        | 3 fresh fig varieties<br><br>1 white & 2 purple                | Slovenia | Dark skinned varieties had higher PCs<br><br>PCs in fruits of 2 <sup>nd</sup> crop > than first crop<br><br>Conc. of PCs: rutin>(+)catechin>chlorogenic acid>(-)-epicatechin>gallic acid>syringic acid                                                                                                                          |
| Dueñas M, 2008 [53]  | Anthocyanin composition                              | AC(anthocyanin):<br>HPLC-DAD-MS                                      | 5 fig varieties<br>green & dark purple<br>peel and pulp        | Spain    | 15 AC pigments with cyanidin as major aglycone; pelargonidin also detected.<br><br>Rutinose & glucose major sugars attached to AC. Acylation with malonic acid also observed<br><br>AC derived pigments detected<br><br>AC > in skin compared to pulp<br><br>C3R>C3G both in skin & pulps<br><br>Malonyl derivatives: skin>pulp |
| Solomon A, 2006 [30] | AOX                                                  | Color analysis<br>PCs: TPC, TAC, TFC<br>AC: HPLC<br>AOX: TEAC<br>NMR | 6 fig varieties<br>black, red, yellow & green<br>peel and pulp | Turkey   | Darker varieties > TPC than lighter<br><br>Fruit skins>TPC & AOX than pulps<br><br>C3R: major AC confirmed by NMR<br><br>C3R contributed 92% of AOX anthocyanin fraction<br><br>AOX correlated with TAC and TPC<br><br>Mission variety had highest TPC, TAC and AOX capacity                                                    |

|                          |                              |                                                                                                                              |                                                    |           |                                                                                                                                                                                                                                                              |
|--------------------------|------------------------------|------------------------------------------------------------------------------------------------------------------------------|----------------------------------------------------|-----------|--------------------------------------------------------------------------------------------------------------------------------------------------------------------------------------------------------------------------------------------------------------|
| Su Q,<br>2002 [57]       | Carotenoids                  | Carotenoids<br>analyzed by HPLC-<br>UV                                                                                       | Fig along with<br>other foods<br><br>2-6 specimens | Australia | The carotenoids present in figs included lutein,<br>cryptoxanthin, lycopene, $\beta$ -carotene<br><br>and $\alpha$ -carotene.<br><br>Fig carotenoids appearing in plasma at very low<br>concentrations                                                       |
| Wendeln MC,<br>2000 [80] | Nutritional<br>value of figs | fiber, tannins,<br>lipids, protein,<br>carbohydrates,<br>minerals<br><br>Amino acids (AA):<br>Ion exchange<br>chromatography | 14 fig varieties                                   | Panama    | pulp had one-third digestible components, mostly<br>carbohydrates lipids & proteins.<br><br>Major AA: leucine, lysine, valine, and arginine,<br>Major minerals: K, Ca, Mg, Na & P<br><br>Small figs had as much nutritional value per gram<br>as large figs. |

Arrows: ↓ (decrease), ↑ (increase), ↔ (no effect)

AOX: Antioxidant capacity, ABTS : (2,2'-azino-bis(3-ethylbenzothiazoline-6-sul-fonic acid), AA: amino acids, AC: anthocyanins, AOAC: Association of official analytic chemist, AAS: atomic absorption spectroscopy, CUPRAC: cupric ion reducing antioxidant capacity , CA: Caffeic acid, CT: Condensed tannin , CC: Carotene content , DDPH: 2,2-diphenyl-1-picrylhydrazyl, FRAP: Ferric ion reducing antioxidant power, FTIR: Fourier-transform infrared spectroscopy, HPLC-UV : Hight performance liquid chromatography ultraviolet , HPLC-DAD: high performance liquid chromatography diode array detector , HPLC-DAD-ESI/MS: high performance liquid chromatography-diode array detector-electrospray ionization/mass spectrometry, HPLC-RI : high performance liquid chromatography-refractive index, HPLC-PDA : high performance liquid chromatography-photo-diode array detector, LC-DAD-ESI-/MS: liquid chromatography-diode array detector electrospray ionization/ Mass spectrometry , ME : Maceration, MI : maturation index , MEKC : micellar electrokinetic chromatography, NMR: nuclear magnetic resonance , ORAC: oxygen radical absorbance capacity , PCs : phenolic compounds , PAC: Proanthocyanidins , ROS : reactive oxygen species , SLE: solid liquid extraction , SEM: scanning electron microscope , TPC: total phenolic content, TAC : Total anthocyanin content, TFC: total flavonoid contents, TPAC : total proanthocyanidins content, TPA : total proanthocyanidins, TTC : total tannin content, TCC: total carotenoids content, TSS: total soluble solids , TBARS: Thio barbituric acid reactive substances, TEAC : Trolox-equivalent antioxidant capacity, TBHQ: tert-butylhydroquinone, UHPLC-ESI-MS : ultra-high-performance liquid chromatography electrospray ionization mass spectrometry
